# Supplementary material for: Dipropyleneglycol Dimethylether, New Green Solvent for Solid-Phase Peptide Synthesis: Further Challenges to Improve Sustainability in the Development of Therapeutic Peptides
Source: MDPI journal article supplement (doi:10.3390/pharmaceutics15061773), 2023-06-20

## ***SUPPLEMENTARY MATERIAL***

# **Dipropyleneglycol Dimethylether, New Green Solvent for Solid-Phase Peptide Synthesis: Further Challenges to Improve Sustainability in the Development of Therapeutic Peptides**

Giovanni Vivenzio <sup>1,†</sup>, Maria Carmina Scala <sup>1,†</sup>, Pasquale Marino <sup>2</sup>, Michele Manfra <sup>2</sup>, Pietro Campiglia <sup>2,\*</sup> and Marina Sala <sup>1,\*</sup>

<sup>1</sup> Department of Pharmacy, University of Salerno, Via Giovanni Paolo II 132, 84084 Fisciano, Salerno, Italy

<sup>2</sup> Department of Sciences, University of Basilicata, Via dell'Ateneo Lucano 10, 85100 Potenza, Italy

### **\* Corresponding authors:**

Pietro Campiglia,

Phone: +39-089969242, E-mail: pcampiglia@unisa.it;

Marina Sala,

Phone: +39-089968148, E-mail: msala@unisa.it.

† These authors contributed equally to this work.

### **Table of contents:**

|                                                  |     |
|--------------------------------------------------|-----|
| Swelling tests.....                              | S2  |
| Solubility tests.....                            | S3  |
| Deprotection kinetics test .....                 | S5  |
| Coupling test .....                              | S12 |
| Racemization study .....                         | S17 |
| Green SPPS .....                                 | S19 |
| Recycling of decapeptide SPPS waste stream ..... | S22 |

## Swelling tests

**Table S1.** Physical parameters of resins evaluated for swelling tests.

| Resin                            | Loading<br>(mmol·g <sup>-1</sup> ) | Bead Size<br>(Mesh) | Cross-Linking<br>(DVB %) |
|----------------------------------|------------------------------------|---------------------|--------------------------|
| Wang-ChemMatrix                  | 0.60                               | 35-100              | -                        |
| Trityl-OH-ChemMatrix             | 0.44                               | 35-100              | -                        |
| Rink-Amide-ChemMatrix            | 0.48                               | 35-100              | -                        |
| Rink Amide AM PS                 | 0.64                               | 100-200             | 1                        |
| Wang resin PS                    | 0.30                               | 100-200             | 1                        |
| 2-Chlorotrityl chloride resin PS | 1.55                               | 200-400             | 1                        |
| TentaGel S NH <sub>2</sub>       | 0.26                               | 75-150              | -                        |
| TentaGel S Wang                  | 0.26                               | 170                 | -                        |

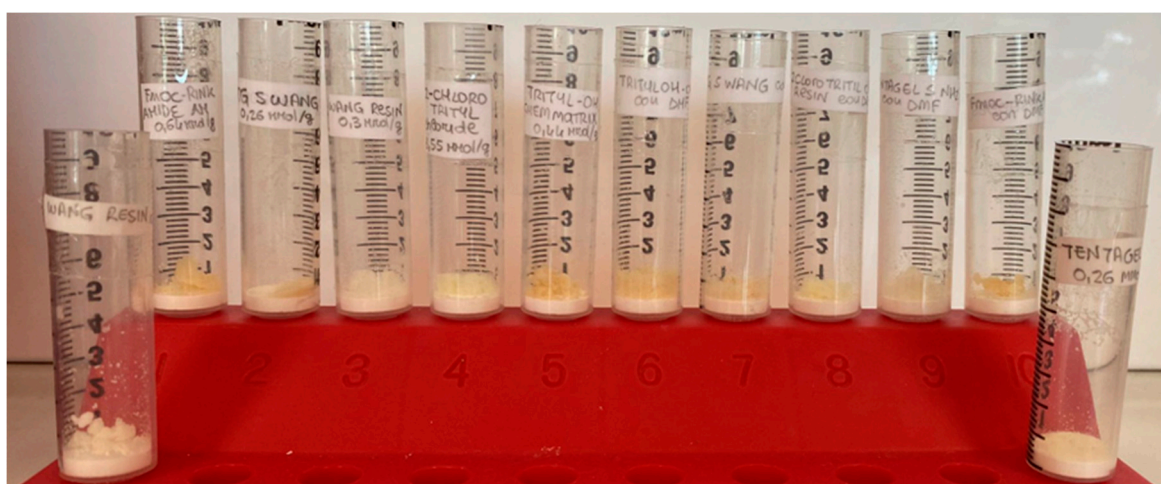

**Figure S1.** Swelling of several resins in DMM and DMF.

**Table S2.** Calculations of standard deviations for the values of the swelling tests in triplicate.

|                            | DMM    |        |        |       |     | DMF    |        |        |        |     |
|----------------------------|--------|--------|--------|-------|-----|--------|--------|--------|--------|-----|
|                            | Swell1 | Swell2 | Swell3 | Mean  | SD  | Swell1 | Swell2 | Swell3 | Mean   | SD  |
| 2-Chlorotrityl chloride PS | 8      | 6      | 5.5    | 6.5   | 1.3 | 6      | 6      | 6      | 6      | 0   |
| Fmoc-Rink Amide AM PS      | 8      | 6      | 7      | 7     | 1.0 | 8      | 6      | 8      | 7.333  | 1.1 |
| Wang resinPS               | 10     | 8      | 10     | 9.333 | 1.1 | 8      | 6      | 6      | 6.667  | 1.1 |
| TentaGel S Wang            | 2      | 4      | 4      | 3.333 | 1.1 | 12     | 10     | 11     | 11     | 1.0 |
| TentaGel S NH <sub>2</sub> | 6.5    | 6      | 8      | 6.833 | 1.0 | 14     | 12     | 12     | 12.667 | 1.1 |
| Wang ChemMatrix            | 6.5    | 4      | 6      | 5.5   | 1.3 | 8      | 8      | 10     | 8.667  | 1.1 |

|                          |    |   |    |       |     |    |    |    |        |     |
|--------------------------|----|---|----|-------|-----|----|----|----|--------|-----|
| Rink-Amide<br>ChemMatrix | 10 | 8 | 8  | 8.667 | 1.1 | 10 | 8  | 10 | 9.333  | 1.1 |
| Trityl-OH<br>ChemMatrix  | 6  | 8 | 10 | 8     | 1.1 | 12 | 10 | 12 | 11.333 | 1.1 |

### Solubility tests

**Table S3.** Solubilization efficacy of Fmoc-AA(PG)-OH amino acids and coupling agents in DMF and DMM. Solubilization monitored at 0.1 M concentration.

| Reagent           | Solubility (M) |      |
|-------------------|----------------|------|
|                   | DMF            | DMM  |
| Fmoc-Gly-OH       | >0.9           | 0.17 |
| Fmoc-Ile-OH       | >0.9           | 0.41 |
| Fmoc-Leu-OH       | >0.9           | 0.5  |
| Fmoc-Val-OH       | >0.9           | 0.45 |
| Fmoc-Ala-OH       | >0.9           | 0.22 |
| Fmoc-Phe-OH       | 0.35           | 0.15 |
| Fmoc-Pro-OH       | >0.9           | 0.45 |
| Fmoc-Met-OH       | >0.9           | 0.31 |
| Fmoc-Tyr(tBu)-OH  | 0.9            | 0.2  |
| Fmoc-Thr(tBu)-OH  | >0.9           | >0.9 |
| Fmoc-Ser(tBu)-OH  | >0.9           | >0.9 |
| Fmoc-Asp(OtBu)-OH | >0.9           | 0.15 |
| Fmoc-Glu(OtBu)-OH | >0.9           | >0.9 |
| Fmoc-Cys(Trt)-OH  | 0.45           | 0.13 |
| Fmoc-Asn(Trt)-OH  | >0.9           | 0.1  |
| Fmoc-Gln(trt)-OH  | >0.9           | 0.18 |
| Fmoc-His(Trt)-OH  | 0.3            | 0.01 |
| Fmoc-Lys(Boc)-OH  | >0.9           | 0.26 |
| Fmoc-Trp(Boc)-OH  | 0.9            | >0.9 |
| Fmoc-Arg(Pbf)-OH  | >0.9           | >0.9 |
| HOBt              | >0.9           | 0.16 |
| CDI               | >0.9           | 0.4  |
| OxymaPure         | >0.9           | >0.9 |
| HATU              | 0.5            | Ins. |
| COMU              | >0.9           | Ins. |
| DIC               | >0.9           | >0.9 |

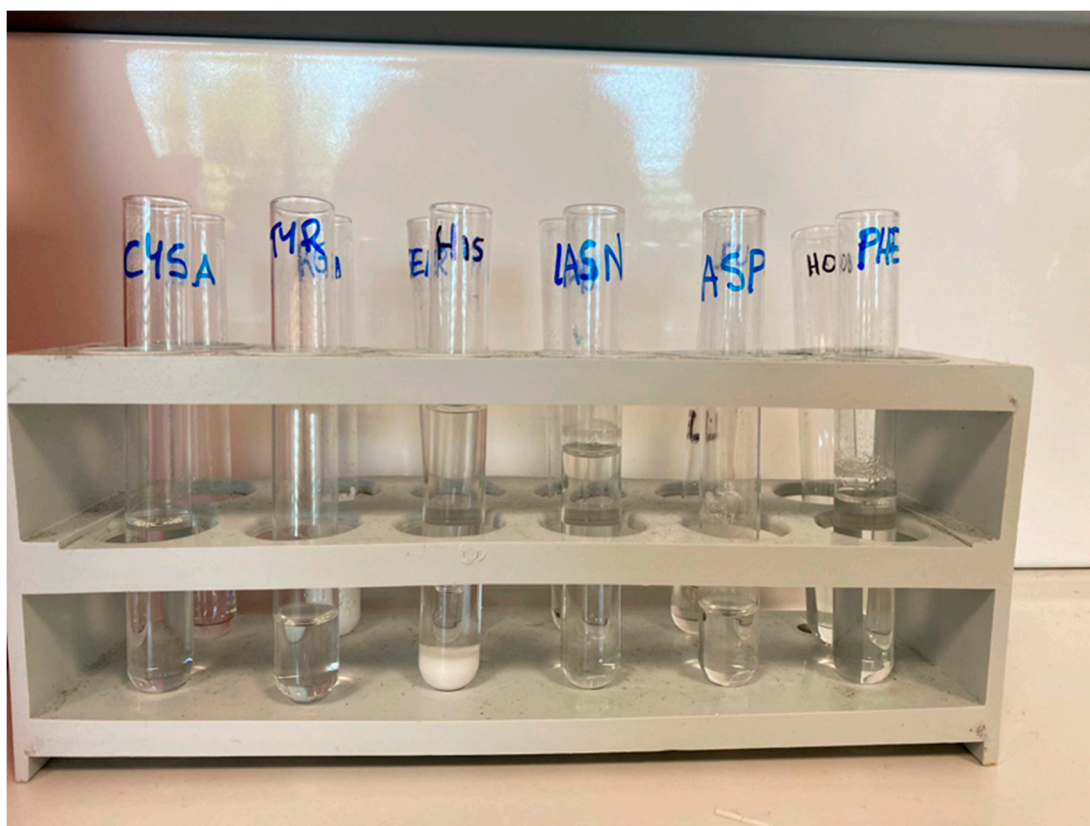

**Figure S2.** Solubilization efficacy of Fmoc-AA(PG)-OH amino acids in DMM.

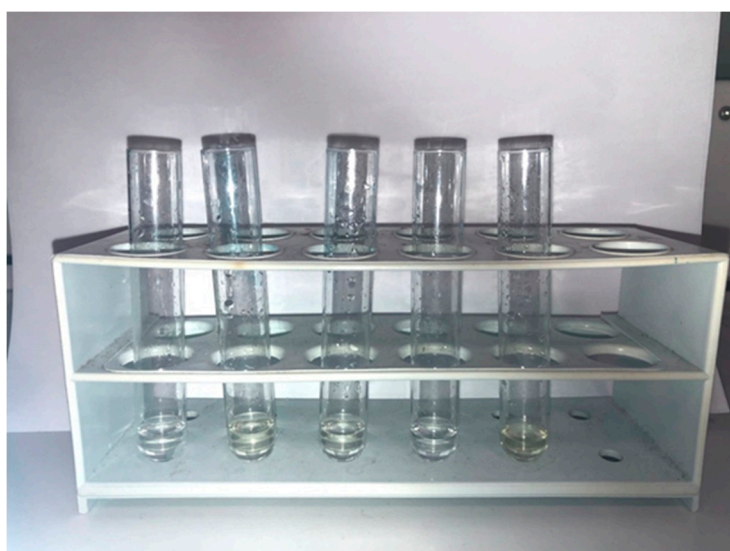

**Figure S3.** Solubilization efficacy of coupling agents in DMM.

## Deprotection kinetics test

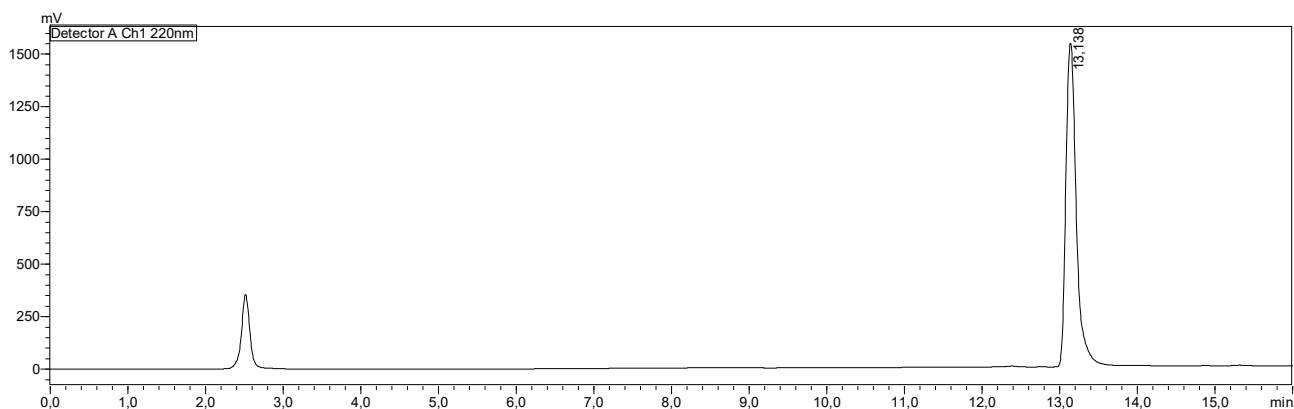

| Peak# | Name        | Ret. Time | Width | Area     | Height  | Area%   |
|-------|-------------|-----------|-------|----------|---------|---------|
| 1     | Fmoc-Val-OH | 13,138    | 0,229 | 14251779 | 1538817 | 100,000 |

**Figure S4.** Chromatogram of Fmoc-Val-OH deprotection in DMM at t=0 (before base addition).

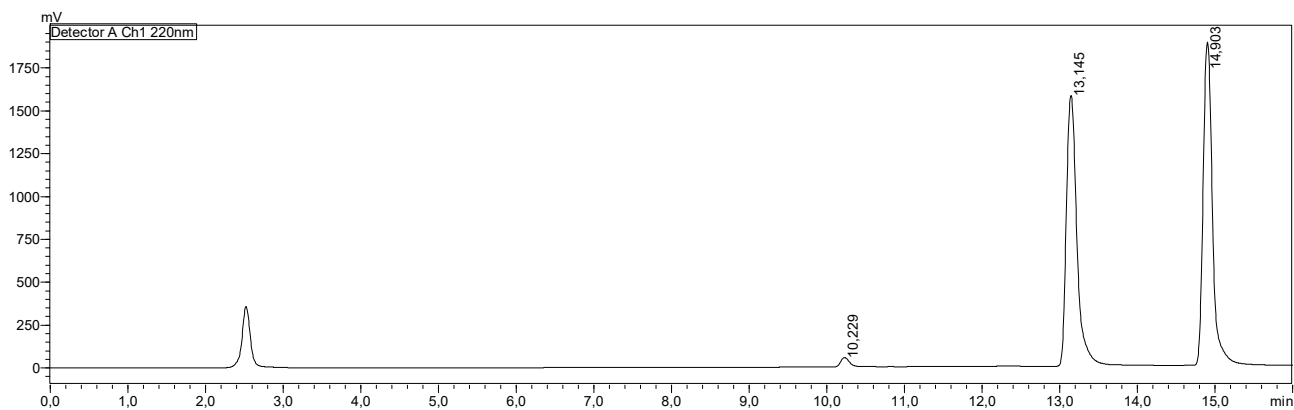

| Peak# | Name            | Ret. Time | Width | Area     | Height  | Area%  |
|-------|-----------------|-----------|-------|----------|---------|--------|
| 1     | DBF-base adduct | 10,229    | 0,203 | 418968   | 55107   | 1,371  |
| 2     | Fmoc-Val-OH     | 13,145    | 0,230 | 14715610 | 1573841 | 48,143 |
| 3     | DBF             | 14,903    | 0,204 | 15431657 | 1883178 | 50,486 |

**Figure S5.** Chromatogram of Fmoc-Val-OH deprotection in DMM at t= 2 min.

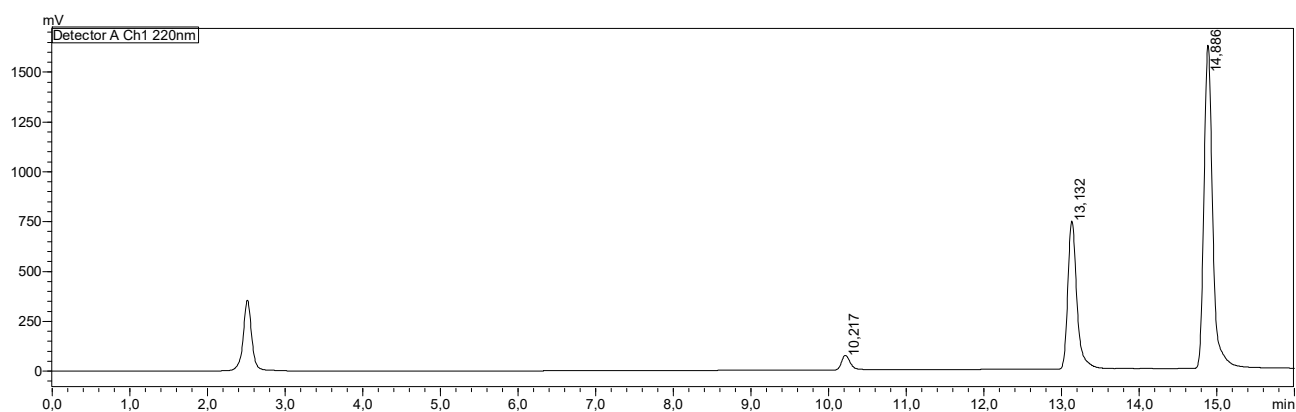

| Peak# | Name            | Ret. Time | Width | Area     | Height  | Area%  |
|-------|-----------------|-----------|-------|----------|---------|--------|
| 1     | DBF-base adduct | 10,217    | 0,203 | 548153   | 72131   | 2,915  |
| 2     | Fmoc-Val-OH     | 13,132    | 0,205 | 5982151  | 742090  | 31,809 |
| 3     | DBF             | 14,886    | 0,195 | 12275991 | 1615485 | 65,276 |

**Figure S6.** Chromatogram of Fmoc-Val-OH deprotection in DMM at t= 4 min.

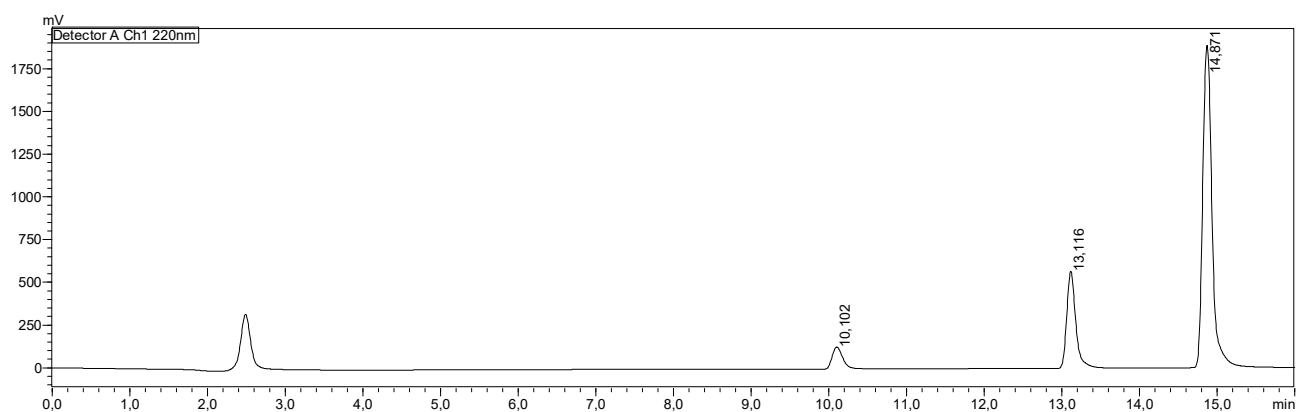

| Peak# | Name            | Ret. Time | Width | Area     | Height  | Area%  |
|-------|-----------------|-----------|-------|----------|---------|--------|
| 1     | DBF-base adduct | 10,102    | 0,245 | 1180446  | 127796  | 5,613  |
| 2     | Fmoc-Val-OH     | 13,116    | 0,204 | 4522576  | 565880  | 21,505 |
| 3     | DBF             | 14,871    | 0,204 | 15327048 | 1880579 | 72,882 |

**Figure S7.** Chromatogram of Fmoc-Val-OH deprotection in DMM at t= 6 min.

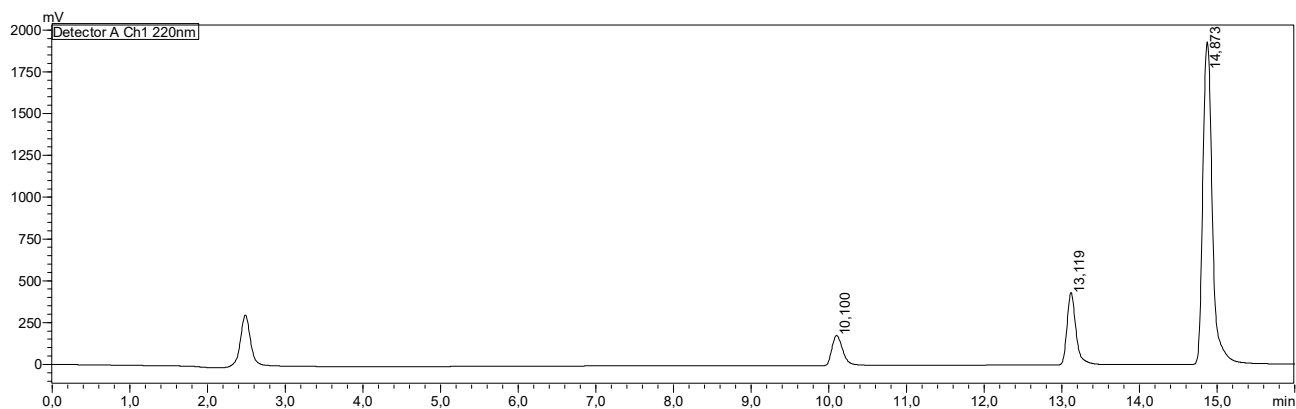

| Peak# | Name            | Ret. Time | Width | Area     | Height  | Area%  |
|-------|-----------------|-----------|-------|----------|---------|--------|
| 1     | DBF-base adduct | 10,100    | 0,250 | 1661495  | 178256  | 7,973  |
| 2     | Fmoc-Val-OH     | 13,119    | 0,201 | 3236642  | 426500  | 15,531 |
| 3     | DBF             | 14,873    | 0,208 | 15941492 | 1923878 | 76,496 |

**Figure S8.** Chromatogram of Fmoc-Val-OH deprotection in DMM at t= 8 min.

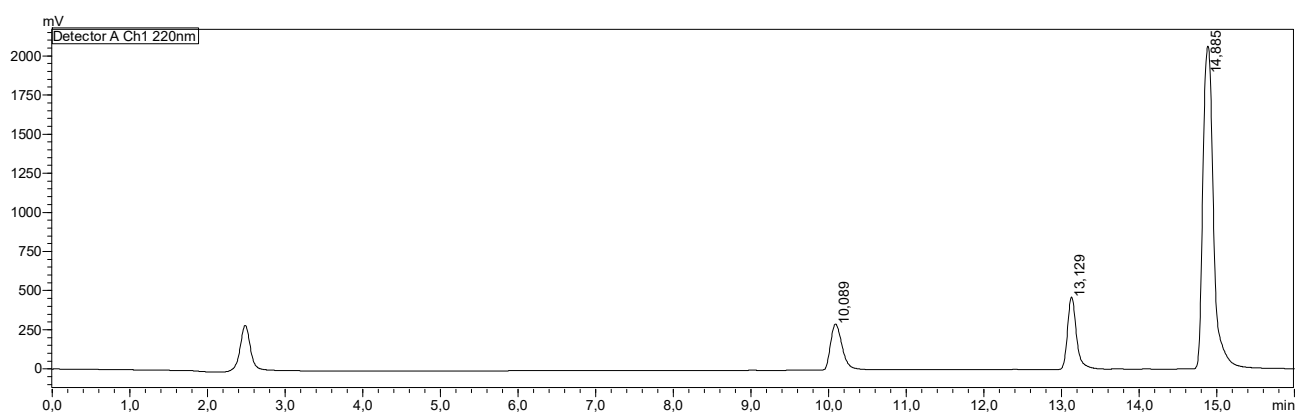

| Peak# | Name            | Ret. Time | Width | Area     | Height  | Area%  |
|-------|-----------------|-----------|-------|----------|---------|--------|
| 1     | DBF-base adduct | 10,089    | 0,269 | 2931482  | 291530  | 11,458 |
| 2     | Fmoc-Val-OH     | 13,129    | 0,203 | 3569124  | 458976  | 13,950 |
| 3     | DBF             | 14,885    | 0,222 | 19083894 | 2057889 | 74,592 |

**Figure S9.** Chromatogram of Fmoc-Val-OH deprotection in DMM at t= 10 min.

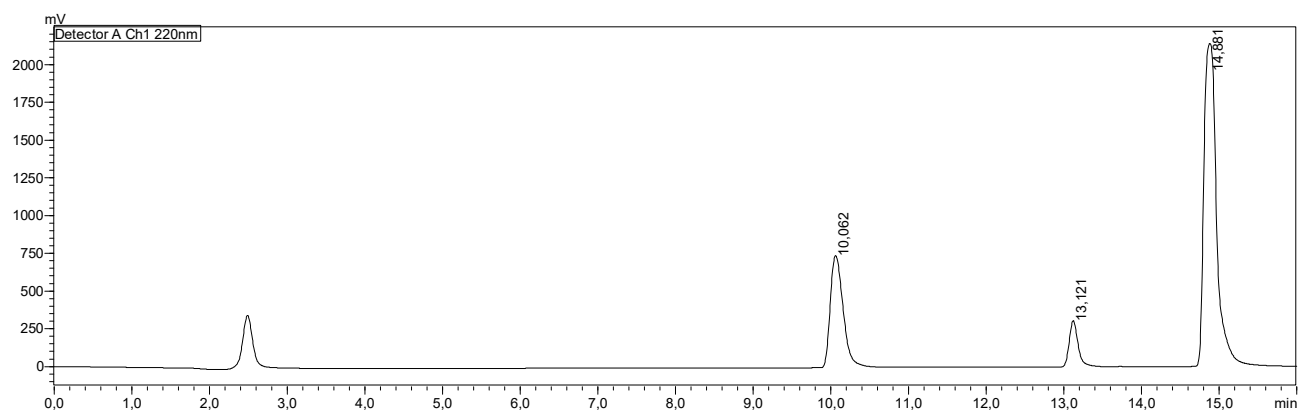

| Peak# | Name            | Ret. Time | Width | Area     | Height  | Area%  |
|-------|-----------------|-----------|-------|----------|---------|--------|
| 1     | DBF-base adduct | 10,062    | 0,298 | 8223931  | 734149  | 24,040 |
| 2     | Fmoc-Val-OH     | 13,121    | 0,199 | 2250014  | 300470  | 6,577  |
| 3     | DBF             | 14,881    | 0,249 | 23736102 | 2132039 | 69,383 |

**Figure S10.** Chromatogram of Fmoc-Val-OH deprotection in DMM at t= 15 min.

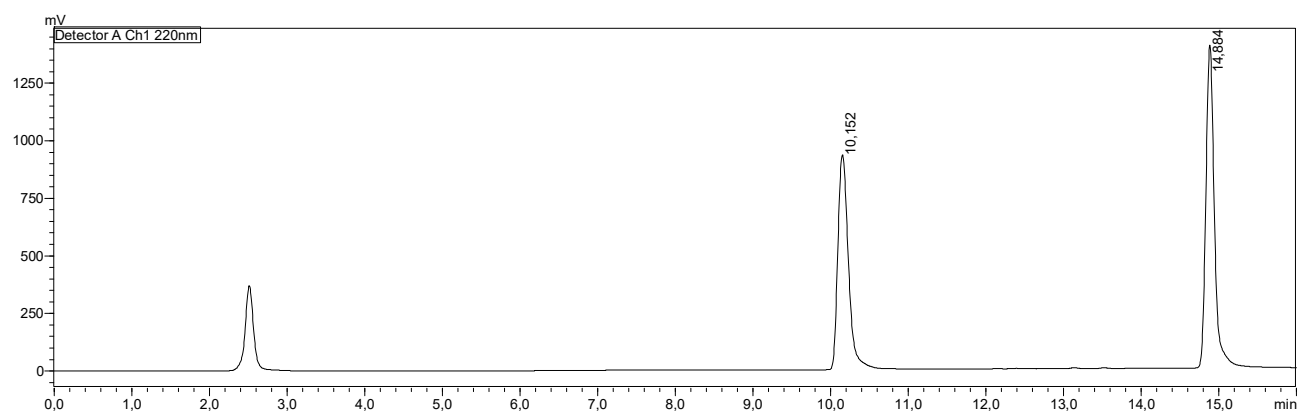

| Peak# | Name            | Ret. Time | Width | Area     | Height  | Area%  |
|-------|-----------------|-----------|-------|----------|---------|--------|
| 1     | DBF-base adduct | 10,152    | 0,242 | 8760171  | 932131  | 45,734 |
| 2     | DBF             | 14,884    | 0,191 | 10394613 | 1398695 | 54,266 |

**Figure S11.** Chromatogram of Fmoc-Val-OH deprotection in DMM at t= 30 min.

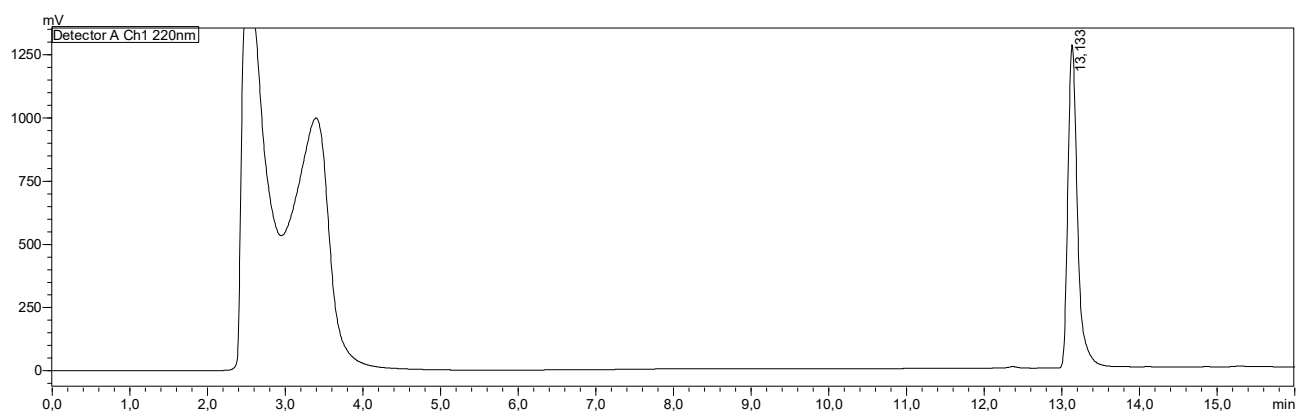

| Peak# | Name        | Ret. Time | Width | Area     | Height  | Area%   |
|-------|-------------|-----------|-------|----------|---------|---------|
| 1     | Fmoc-Val-OH | 13,133    | 0,215 | 10821356 | 1275772 | 100,000 |

**Figure S12.** Chromatogram of Fmoc-Val-OH deprotection in DMF at t=0 (before base addition).

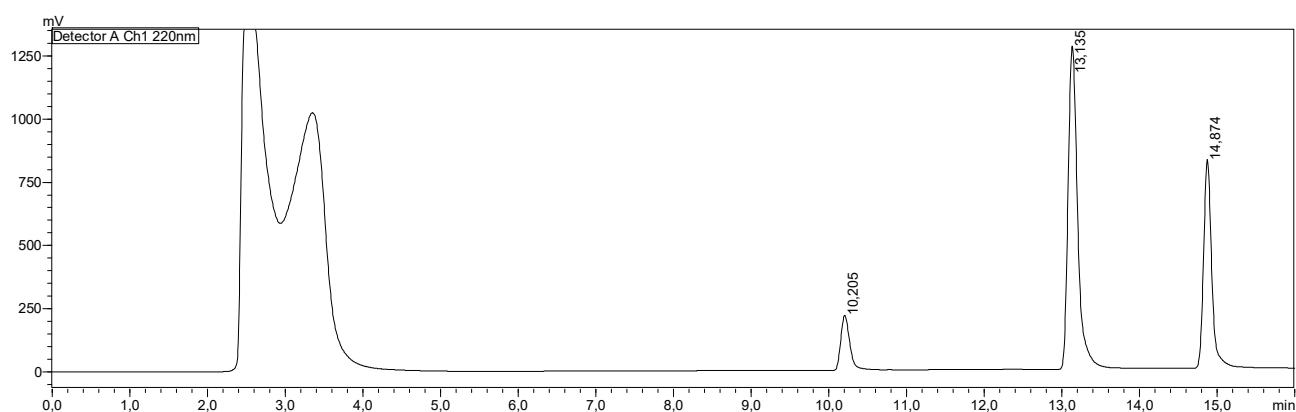

| Peak# | Name            | Ret. Time | Width | Area     | Height  | Area%  |
|-------|-----------------|-----------|-------|----------|---------|--------|
| 1     | DBF-base adduct | 10,205    | 0,204 | 1617176  | 213629  | 8,921  |
| 2     | Fmoc-Val-OH     | 13,135    | 0,213 | 10702545 | 1274616 | 59,042 |
| 3     | DBF             | 14,874    | 0,185 | 5807160  | 822032  | 32,036 |

**Figure S13.** Chromatogram of Fmoc-Val-OH deprotection in DMF at t= 2 min.

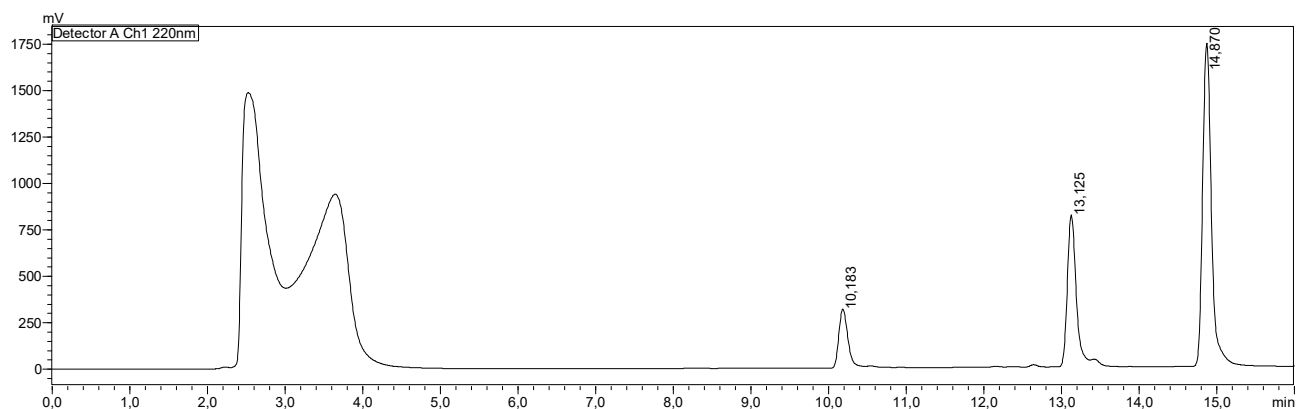

| Peak# | Name            | Ret. Time | Width | Area     | Height  | Area%  |
|-------|-----------------|-----------|-------|----------|---------|--------|
| 1     | DBF-base adduct | 10,183    | 0,209 | 2464302  | 314820  | 10,872 |
| 2     | Fmoc-Val-OH     | 13,125    | 0,203 | 6721964  | 815796  | 29,657 |
| 3     | DBF             | 14,870    | 0,197 | 13479233 | 1737183 | 59,470 |

**Figure S14.** Chromatogram of Fmoc-Val-OH deprotection in DMF at t= 4 min.

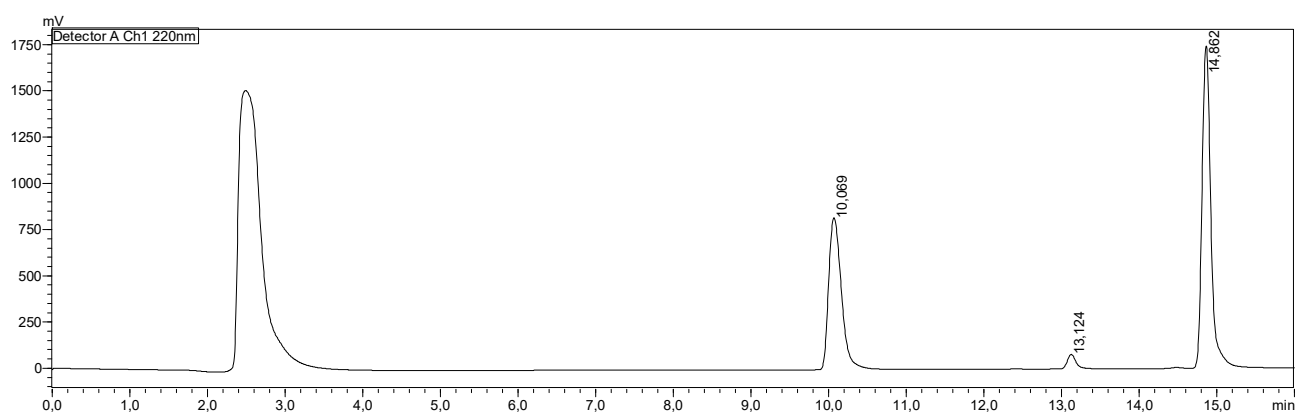

| Peak# | Name            | Ret. Time | Width | Area     | Height  | Area%  |
|-------|-----------------|-----------|-------|----------|---------|--------|
| 1     | DBF-base adduct | 10,069    | 0,292 | 9074854  | 817871  | 39,383 |
| 2     | Fmoc-Val-OH     | 13,124    | 0,189 | 511591   | 74331   | 2,220  |
| 3     | DBF             | 14,862    | 0,197 | 13455889 | 1737182 | 58,396 |

**Figure S15.** Chromatogram of Fmoc-Val-OH deprotection in DMF at t= 6 min.

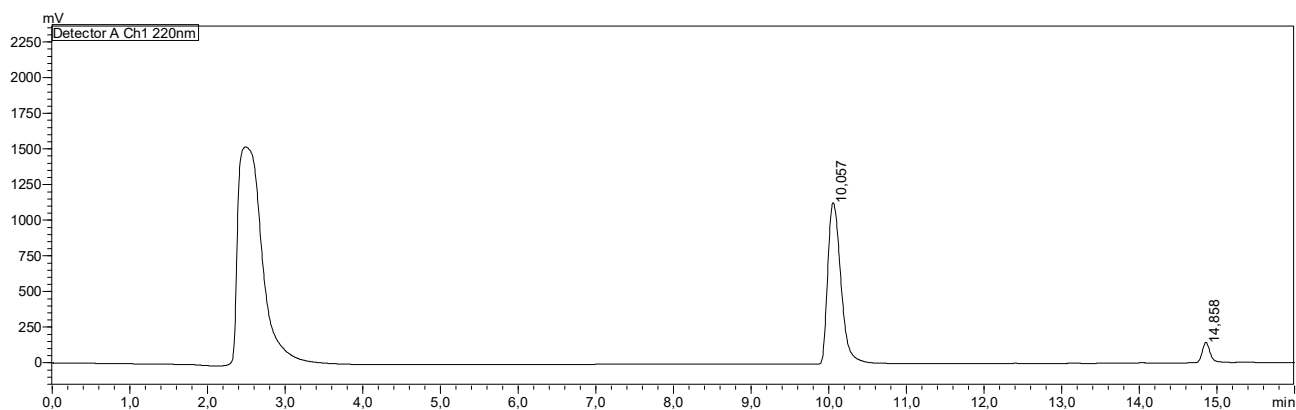

| Peak# | Name            | Ret. Time | Width | Area     | Height  | Area%  |
|-------|-----------------|-----------|-------|----------|---------|--------|
| 1     | DBF-base adduct | 10,057    | 0,301 | 13023434 | 1126822 | 93,681 |
| 2     | DBF             | 14,858    | 0,176 | 878511   | 137028  | 6,319  |

**Figure S16.** Chromatogram of Fmoc-Val-OH deprotection in DMF at t= 8 min.

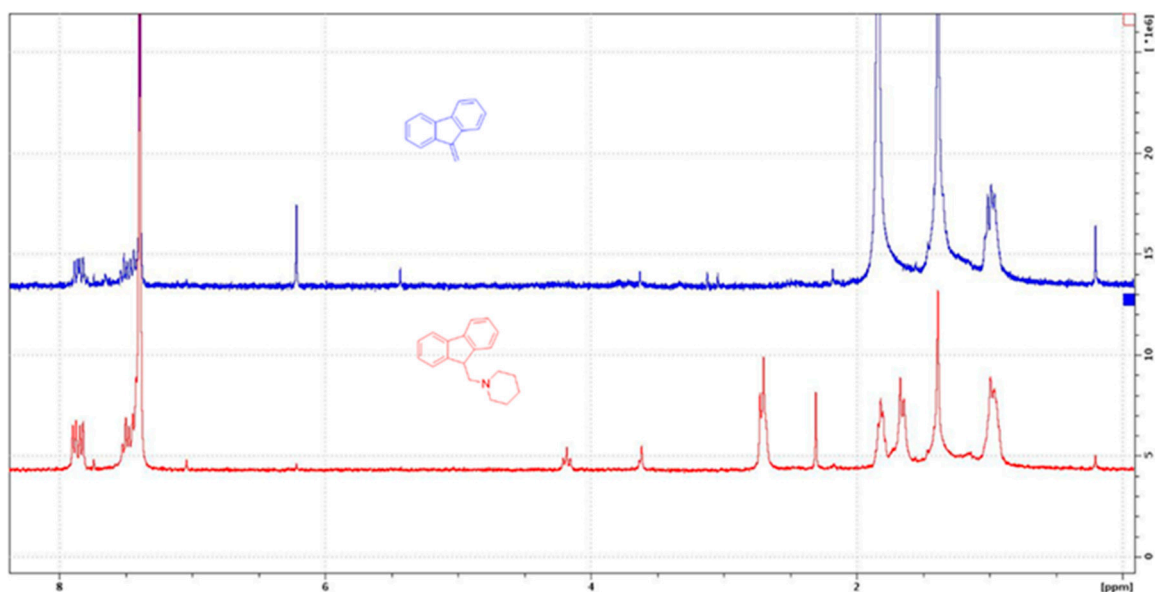

**Figure S17.**  $^1\text{H}$  NMR spectrum (400 MHz,  $\text{DCM-d}_6$ ) after deprotection with 20% piperidine in DMM of Fmoc-Val-OH; the peaks at 6.45 ppm and aromatic signals between 7.5 and 8.5 ppm correspond to DBF, the peaks at 2.75 ppm and aromatic signals between 7.5 and 8.5 ppm correspond to DBF-base adduct.

## Coupling test

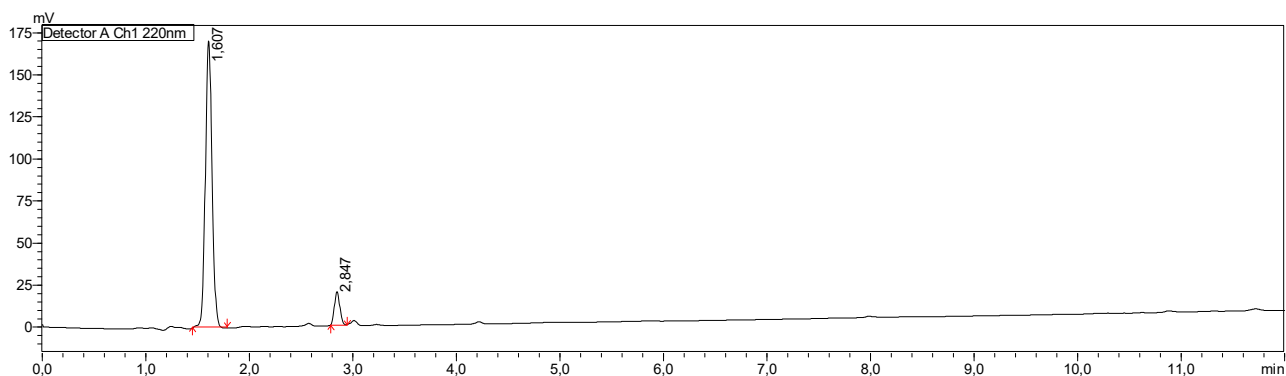

| Peak# | Name                        | Ret. Time | Width | Area   | Height | Area%  |
|-------|-----------------------------|-----------|-------|--------|--------|--------|
| 1     | NH <sub>2</sub> -Tyr-Ala-OH | 1,607     | 0,123 | 755632 | 170105 | 91,144 |
| 2     |                             | 2,847     | 0,104 | 73419  | 19854  | 8,856  |

**Figure S18.** Chromatogram of NH<sub>2</sub>-Tyr-Ala-OH dipeptide synthesized manually in DMM with (HOBt/DIC) (1:1).

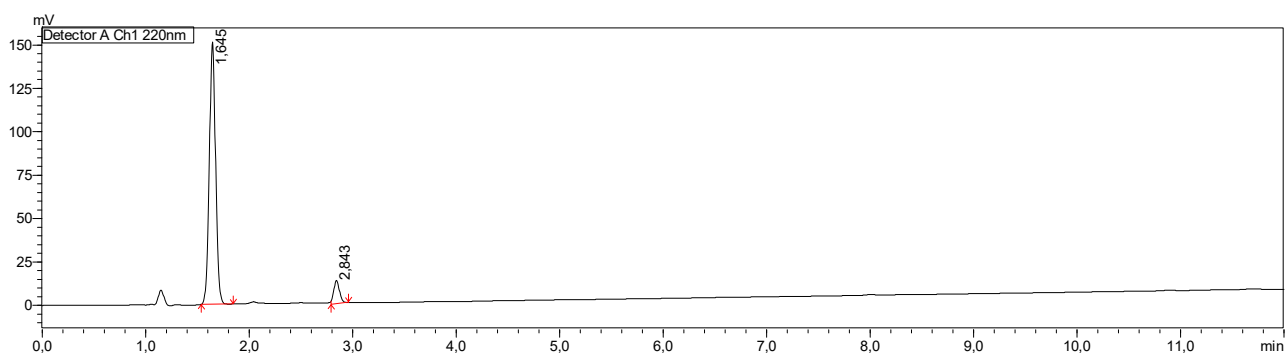

| Peak# | Name                        | Ret. Time | Width | Area   | Height | Area%  |
|-------|-----------------------------|-----------|-------|--------|--------|--------|
| 1     | NH <sub>2</sub> -Tyr-Ala-OH | 1,645     | 0,117 | 639199 | 151103 | 92,559 |
| 2     |                             | 2,843     | 0,110 | 51389  | 13388  | 7,441  |

**Figure S19.** Chromatogram of NH<sub>2</sub>-Tyr-Ala-OH dipeptide synthesized manually in DMM with (HOBt/DIC) (1:1) and purified by HPLC.

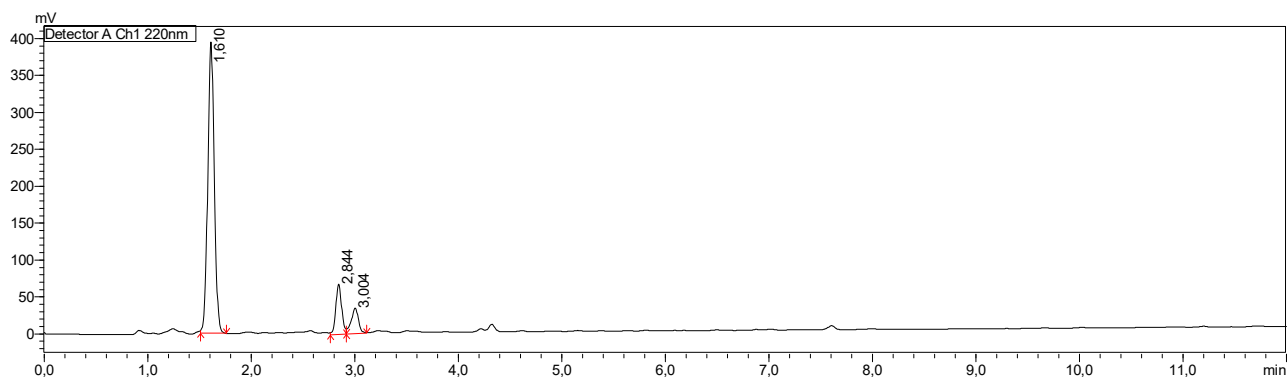

| Peak# | Name                        | Ret. Time | Width | Area    | Height | Area%  |
|-------|-----------------------------|-----------|-------|---------|--------|--------|
| 1     | NH <sub>2</sub> -Tyr-Ala-OH | 1,610     | 0,122 | 1725568 | 394701 | 79,688 |
| 2     |                             | 2,844     | 0,110 | 271185  | 67999  | 12,524 |
| 3     |                             | 3,004     | 0,134 | 168645  | 34661  | 7,788  |

**Figure S20.** Chromatogram of NH<sub>2</sub>-Tyr-Ala-OH dipeptide synthesized manually in DMF with (HOBt/DIC) (1:1).

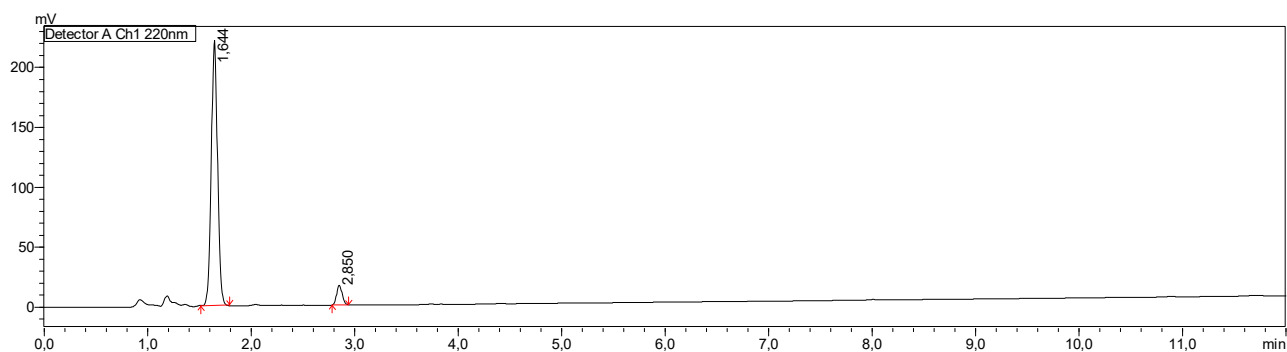

| Peak# | Name                        | Ret. Time | Width | Area   | Height | Area%  |
|-------|-----------------------------|-----------|-------|--------|--------|--------|
| 1     | NH <sub>2</sub> -Tyr-Ala-OH | 1,644     | 0,118 | 935849 | 221057 | 93,918 |
| 2     |                             | 2,850     | 0,106 | 60604  | 16555  | 6,082  |

**Figure S21.** Chromatogram of NH<sub>2</sub>-Tyr-Ala-OH dipeptide synthesized manually in DMF with (HOBt/DIC) (1:1) and purified by HPLC.

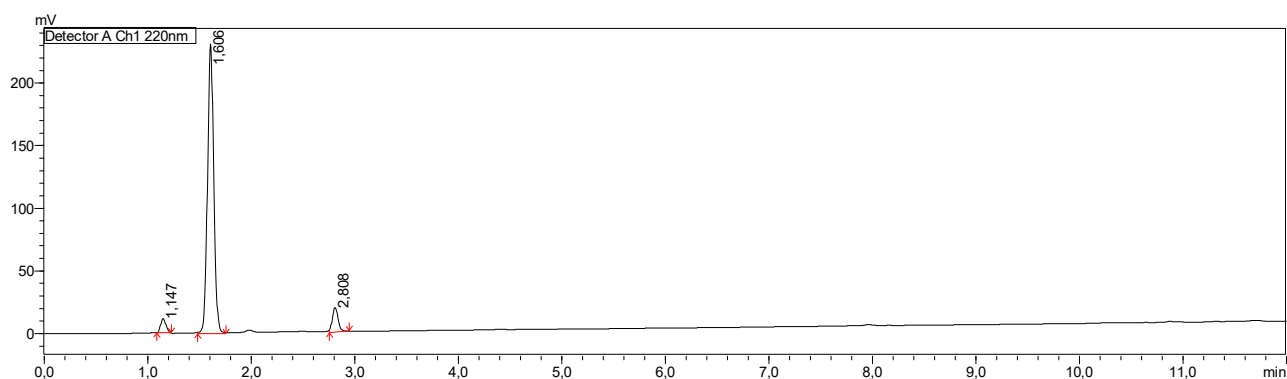

| Peak# | Name                        | Ret.Time | Width | Area   | Height | Area%  |
|-------|-----------------------------|----------|-------|--------|--------|--------|
| 1     |                             | 1,147    | 0,105 | 40362  | 11354  | 3,700  |
| 2     | NH <sub>2</sub> -Tyr-Ala-OH | 1,606    | 0,117 | 974444 | 231592 | 89,326 |
| 3     |                             | 2,808    | 0,111 | 76085  | 19778  | 6,975  |

**Figure S22.** Chromatogram of NH<sub>2</sub>-Tyr-Ala-OH dipeptide synthesized manually in DMM with (OxymaPure/DIC) (1:2).

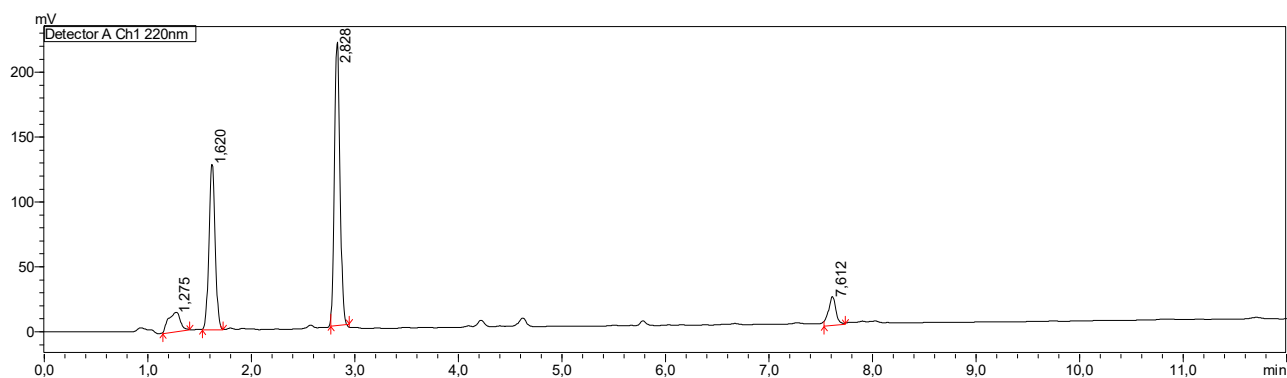

| Peak# | Name                        | Ret. Time | Width | Area   | Height | Area%  |
|-------|-----------------------------|-----------|-------|--------|--------|--------|
| 1     |                             | 1,275     | 0,204 | 124707 | 15031  | 7,906  |
| 2     | NH <sub>2</sub> -Tyr-Ala-OH | 1,620     | 0,115 | 530833 | 127712 | 33,651 |
| 3     |                             | 2,828     | 0,106 | 808110 | 218683 | 51,229 |
| 4     |                             | 7,612     | 0,140 | 113805 | 22243  | 7,214  |

**Figure S23.** Chromatogram of NH<sub>2</sub>-Tyr-Ala-OH dipeptide synthesized manually in DMF with (OxymaPure/DIC) (1:2).

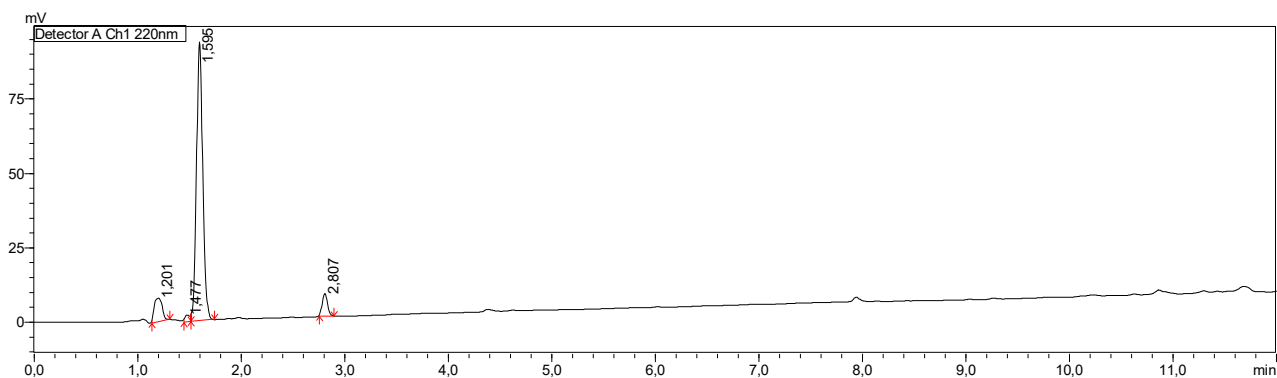

| Peak# | Name                        | Ret. Time | Width | Area   | Height | Area%  |
|-------|-----------------------------|-----------|-------|--------|--------|--------|
| 1     |                             | 1,201     | 0,137 | 42110  | 7805   | 8,921  |
| 2     |                             | 1,477     | 0,345 | 8164   | 2244   | 1,729  |
| 3     | NH <sub>2</sub> -Tyr-Ala-OH | 1,595     | 0,117 | 394523 | 93706  | 83,577 |
| 4     |                             | 2,807     | 0,102 | 27251  | 7579   | 5,773  |

**Figure S24.** Chromatogram of NH<sub>2</sub>-Tyr-Ala-OH dipeptide synthesized manually in DMF with (OxymaPure/DIC) (1:2) and purified by HPLC.

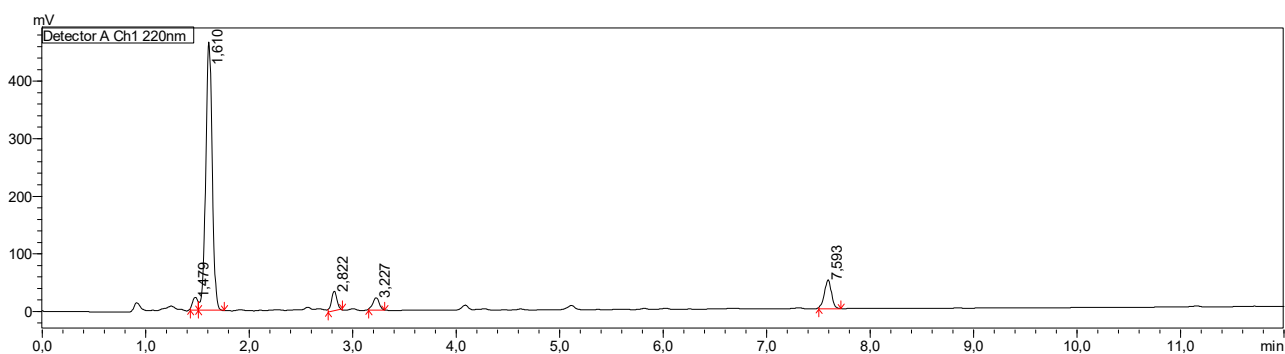

| Peak# | Name                        | Ret. Time | Width | Area    | Height | Area%  |
|-------|-----------------------------|-----------|-------|---------|--------|--------|
| 1     |                             | 1,479     | 0,133 | 79753   | 22441  | 3,112  |
| 2     | NH <sub>2</sub> -Tyr-Ala-OH | 1,610     | 0,120 | 2022168 | 465661 | 78,901 |
| 3     |                             | 2,822     | 0,107 | 120938  | 33335  | 4,719  |
| 4     |                             | 3,227     | 0,129 | 98232   | 21902  | 3,833  |
|       |                             | 7,593     | 0,132 | 241836  | 50258  | 9,436  |

**Figure S25.** Chromatogram of NH<sub>2</sub>-Tyr-Ala-OH dipeptide synthesized microwave in DMM with (OxymaPure/DIC) (1:2) (3 eq. 2 x 10 min).

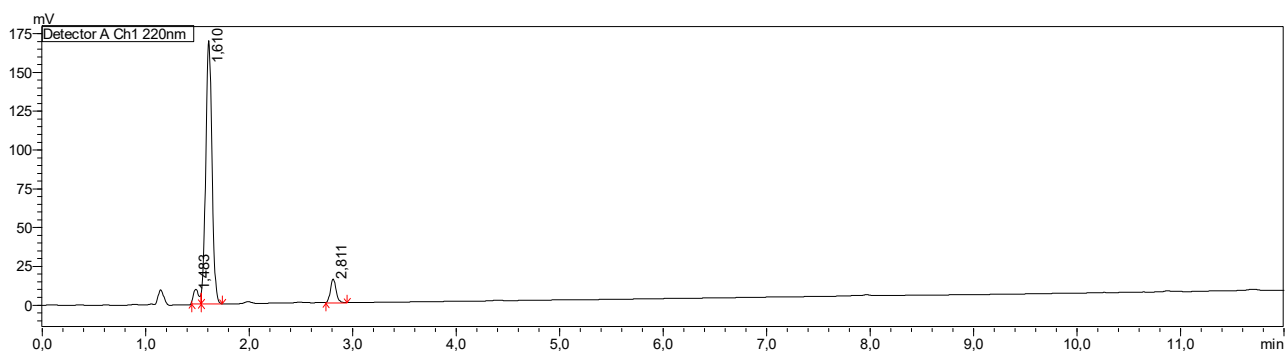

| Peak# | Name                        | Ret. Time | Width | Area   | Height | Area%  |
|-------|-----------------------------|-----------|-------|--------|--------|--------|
| 1     |                             | 1,483     | 0,118 | 36912  | 9599   | 4,558  |
| 2     | NH <sub>2</sub> -Tyr-Ala-OH | 1,610     | 0,117 | 710423 | 169838 | 87,716 |
| 3     |                             | 2,811     | 0,109 | 62577  | 15594  | 7,726  |

**Figure S26.** Chromatogram of NH<sub>2</sub>-Tyr-Ala-OH dipeptide synthesized microwave in DMM with (OxymaPure/DIC) (1:2) (3 eq. 2 x 10 min) and purified by HPLC.

GV/rifer\_22101417155C#10 RT: 0.06 AV: 1 NL: 2.10E5  
T: ITMS+p ESI Full ms [100.00-1000.00]

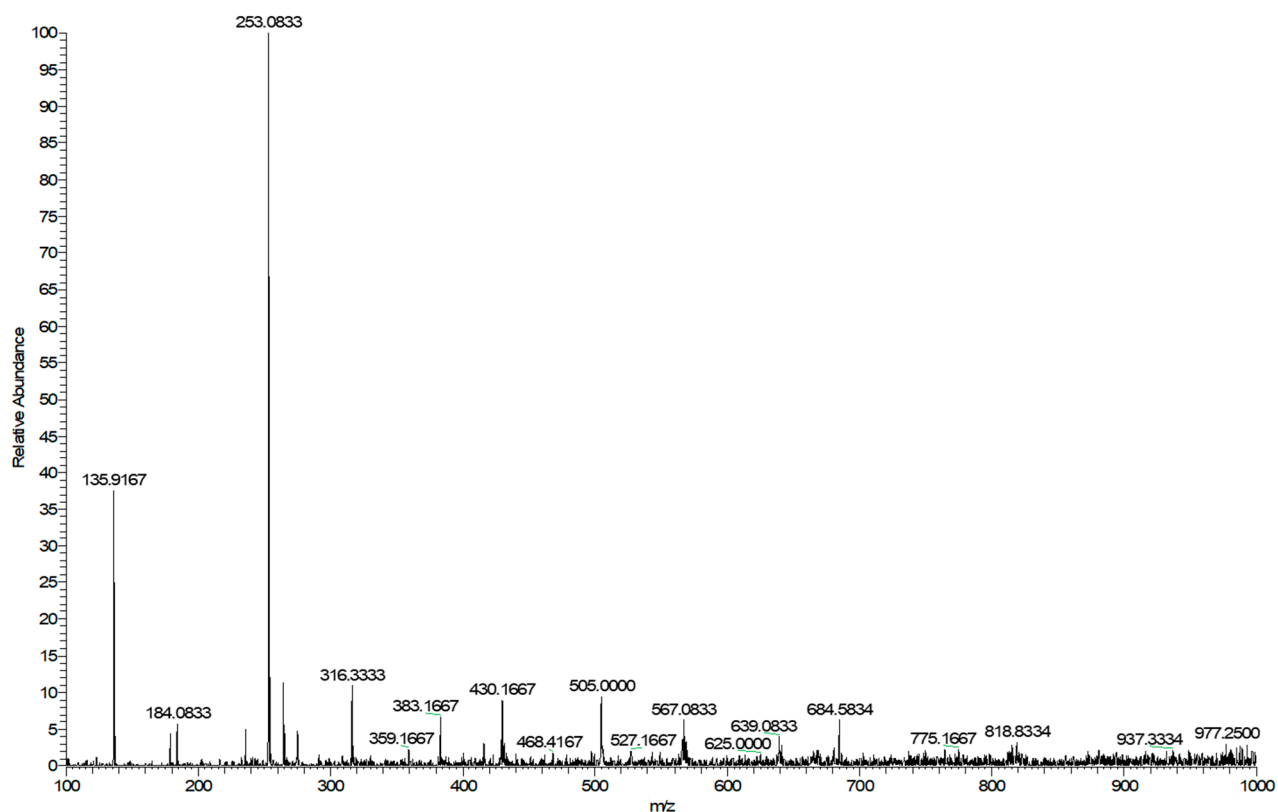

**Figure S27.** ESI-MS of NH<sub>2</sub>-Tyr-Ala-OH dipeptide ion [M+H]<sup>+</sup> (253.0833 Da)

## Racemization study

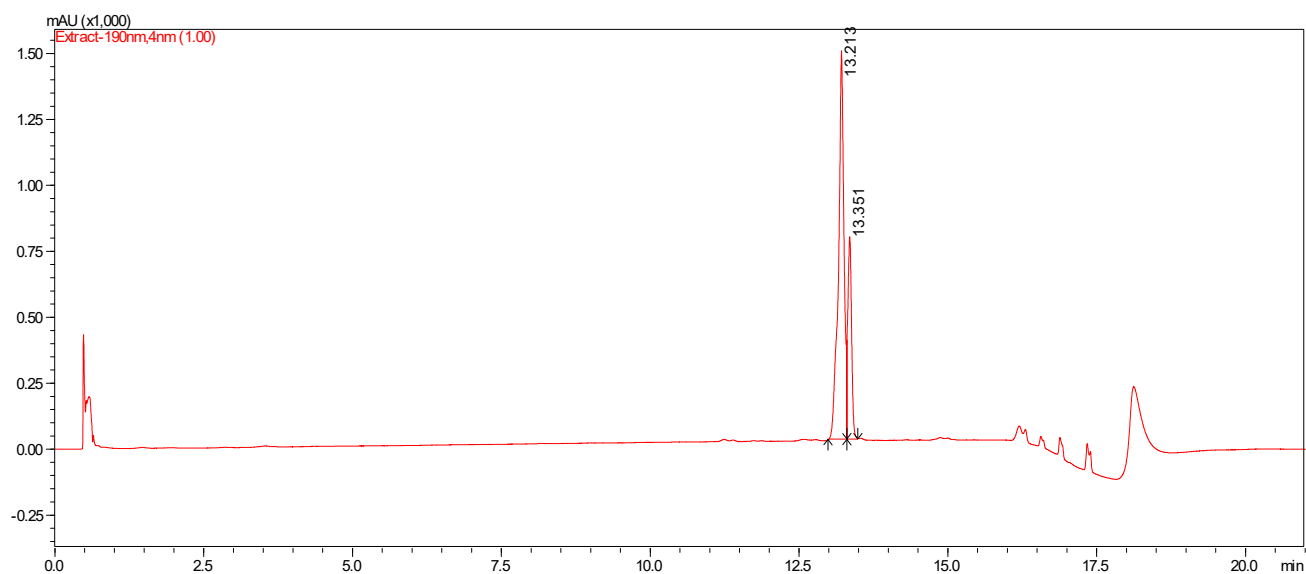

| Peak# | Name                           | Ret. Time | Width | Area    | Height  | Area%   |
|-------|--------------------------------|-----------|-------|---------|---------|---------|
| 1     | Fmoc-Phg-Pro-NH <sub>2</sub>   | 13.213    | 0.086 | 9539379 | 1463542 | 73.9107 |
| 2     | Fmoc-D-Phg-Pro-NH <sub>2</sub> | 13.351    | 0.081 | 3367245 | 760246  | 26.0893 |

**Figure S28.** Chromatogram of Fmoc-Phg-Pro-NH<sub>2</sub> dipeptide synthesized microwave in DMM

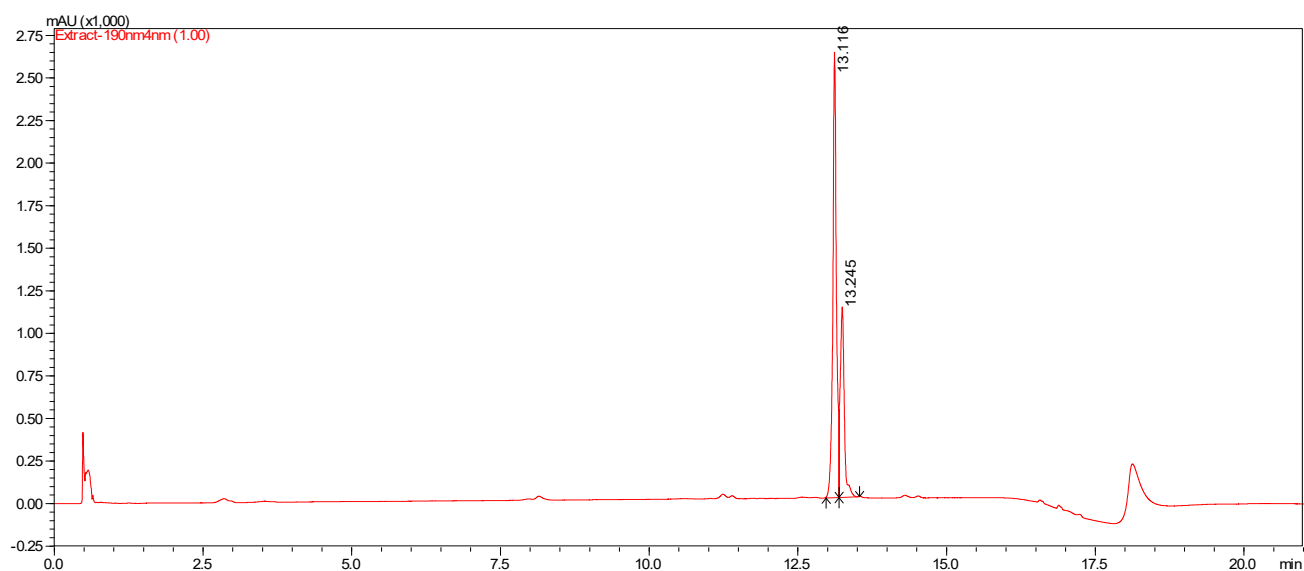

| Peak# | Name                           | Ret. Time | Width | Area     | Height  | Area%   |
|-------|--------------------------------|-----------|-------|----------|---------|---------|
| 1     | Fmoc-Phg-Pro-NH <sub>2</sub>   | 13.116    | 0.054 | 10923289 | 2597350 | 67.2107 |
| 2     | Fmoc-D-Phg-Pro-NH <sub>2</sub> | 13.245    | 0.079 | 5329020  | 1114877 | 32.7893 |

**Figure S29.** Chromatogram of Fmoc-Phg-Pro-NH<sub>2</sub> dipeptide synthesized manually in DMF

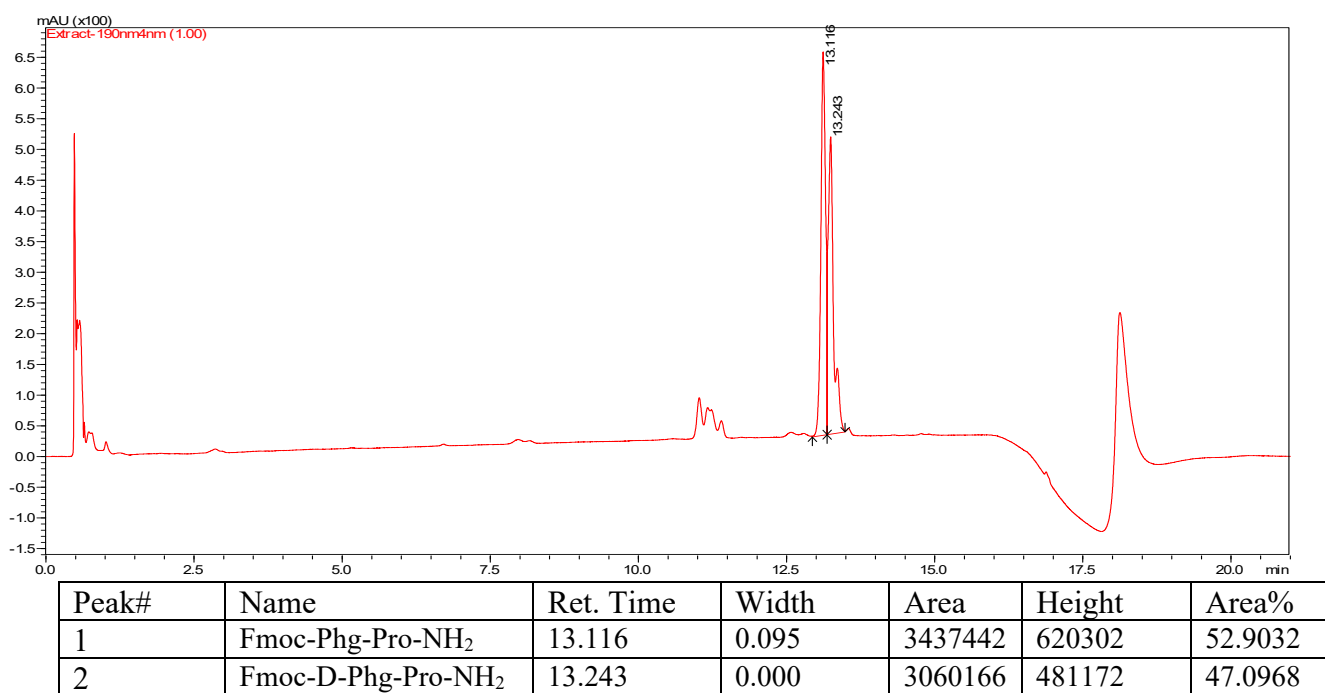

**Figure S30.** Chromatogram of Fmoc-Phg-Pro-NH<sub>2</sub> dipeptide synthesized microwave in DMF

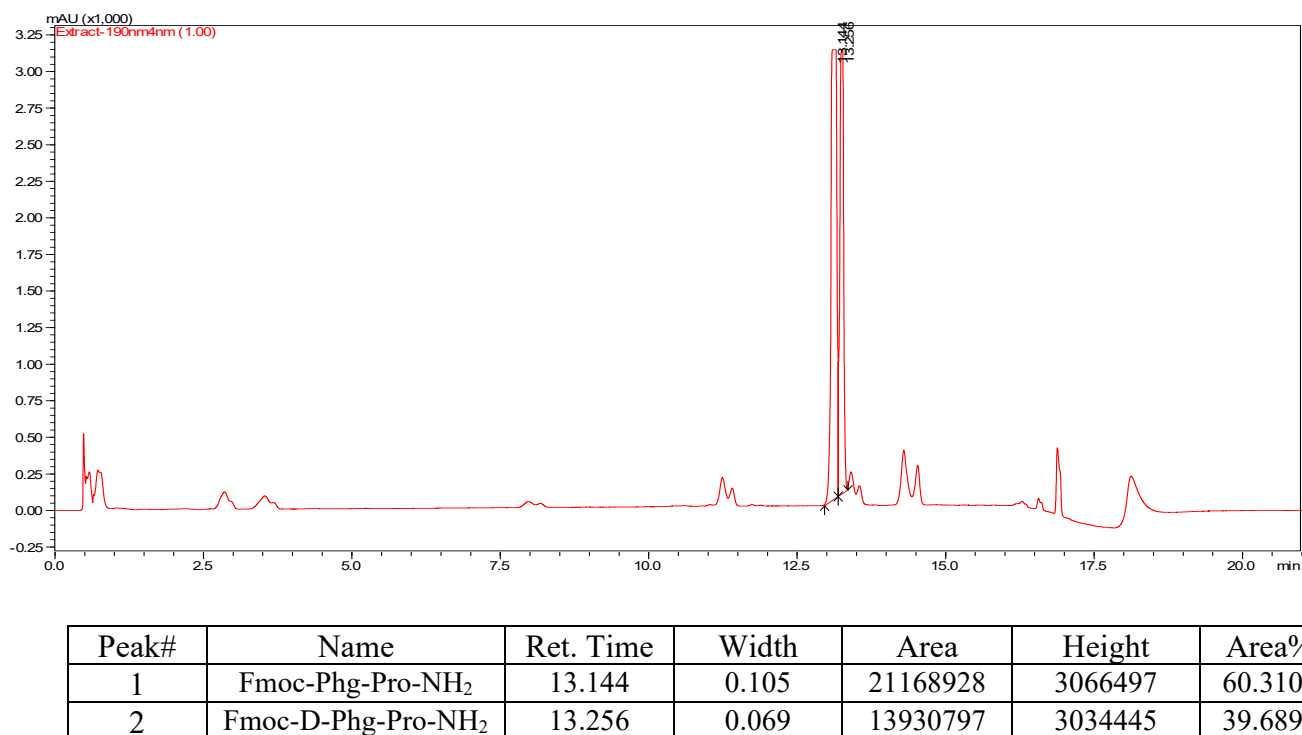

**Figure S31.** Chromatogram of Fmoc-Phg-Pro-NH<sub>2</sub> dipeptide synthesized manually in DMM

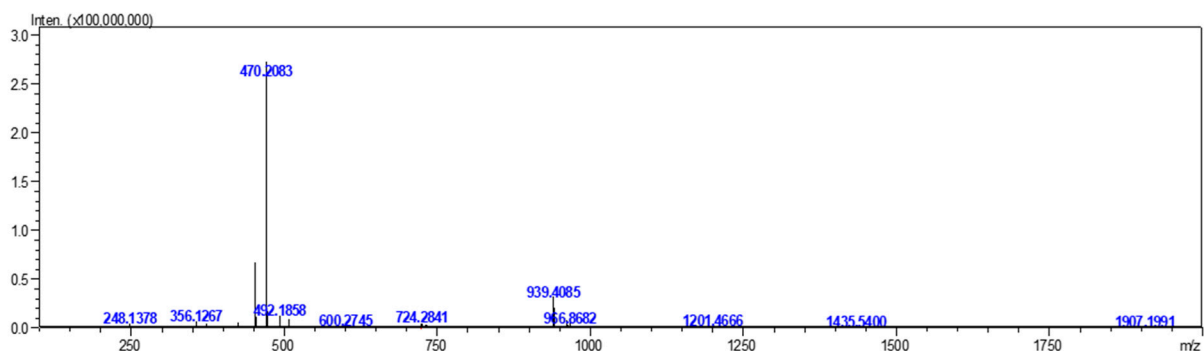

**Figure S32.** ESI-MS of Fmoc-Phg-Pro-NH<sub>2</sub> dipeptide ion [M+H]<sup>+</sup> (470.2083 Da)

## Green SPPS

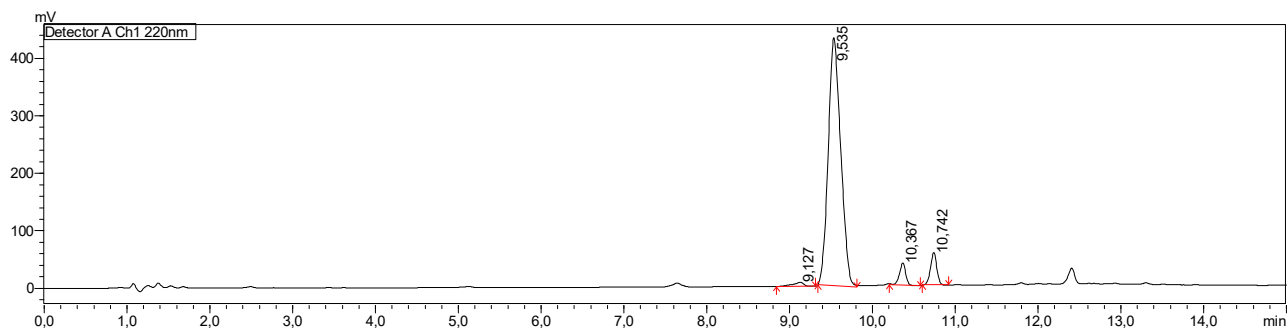

| Peak# | Name                     | Ret. Time | Width | Area    | Height | Area%  |
|-------|--------------------------|-----------|-------|---------|--------|--------|
| 1     | Des-Aib                  | 9,127     | 0,213 | 70358   | 7140   | 1,389  |
| 2     | Aib-enkephalin           | 9,535     | 0,293 | 4519352 | 431118 | 89,199 |
| 3     | Wang linker adduct + tBu | 10,367    | 0,140 | 198111  | 38556  | 3,910  |
| 4     | Des-Aib + tBu + TFA      | 10,742    | 0,142 | 278759  | 55501  | 5,502  |

**Figure S33.** Chromatogram of Aib- enkephalin synthesized on Wang PS resin in DMF

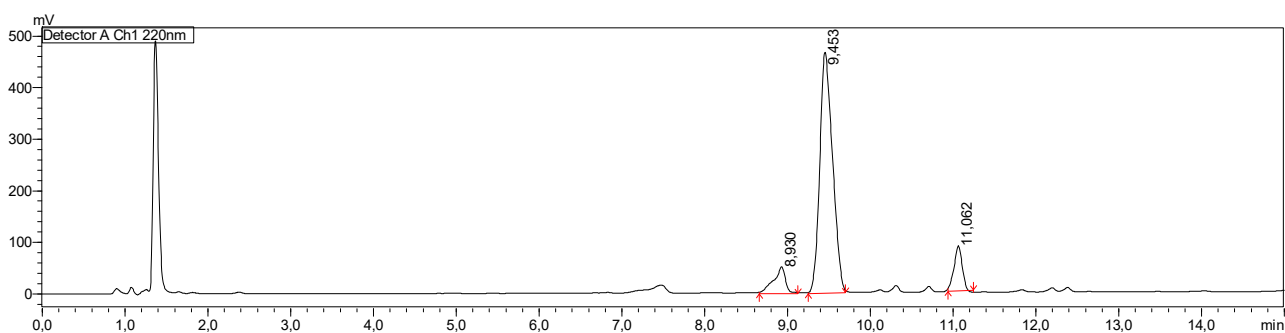

| Peak# | Name                          | Ret. Time | Width | Area    | Height | Area%  |
|-------|-------------------------------|-----------|-------|---------|--------|--------|
| 1     | Des-Aib                       | 8,930     | 0,215 | 530264  | 52072  | 8,655  |
| 2     | Aib-enkephalin                | 9,453     | 0,302 | 5008932 | 466523 | 81,759 |
| 3     | Dimer Aib-enkephalin + formyl | 11,062    | 0,189 | 587247  | 87345  | 9,585  |

**Figure S34.** Chromatogram of Aib- enkephalin synthesized on Wang PS resin in DMM

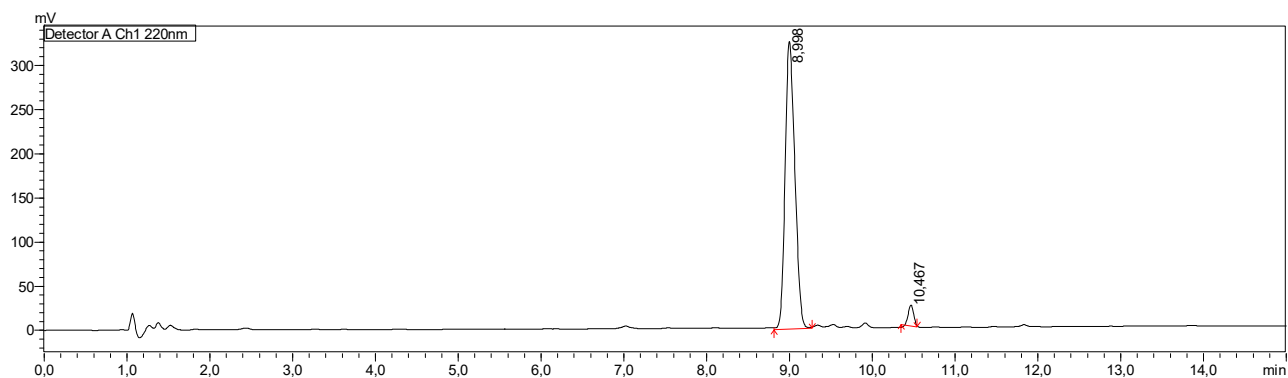

| Peak# | Name                | Ret. Time | Width | Area    | Height | Area%  |
|-------|---------------------|-----------|-------|---------|--------|--------|
| 1     | Aib-enkephalin      | 8,998     | 0,225 | 2656080 | 325946 | 94,877 |
| 2     | Des-Aib + tBu + TFA | 10,467    | 0,141 | 143431  | 25747  | 5,123  |

**Figure S35.** Chromatogram of Aib- enkephalin synthesized on Rink-Amide CM resin in DMF

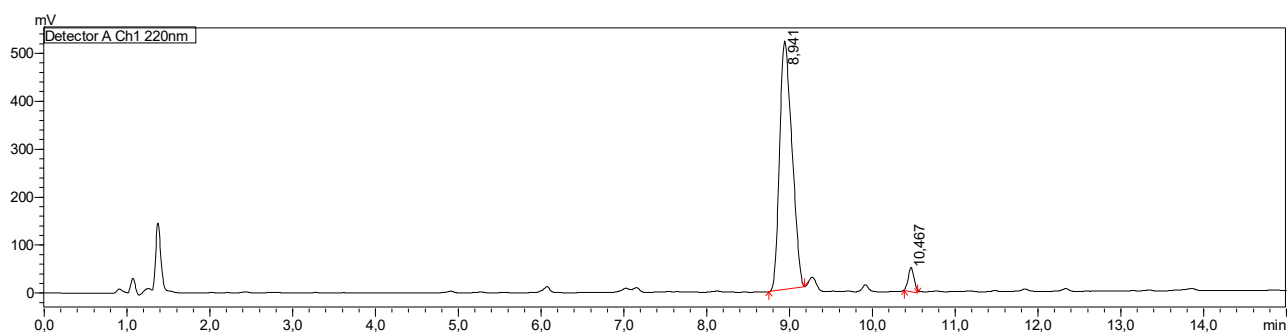

| Peak# | Name            | Ret. Time | Width | Area    | Height | Area%  |
|-------|-----------------|-----------|-------|---------|--------|--------|
| 1     | Aib-enkephalin  | 8,941     | 0,299 | 5392569 | 517778 | 95,597 |
| 3     | Des-Aib+tBu+TFA | 10,467    | 0,140 | 248392  | 50199  | 4,403  |

**Figure S36.** Chromatogram of Aib- enkephalin synthesized on Rink-Amide CM resin in DMM

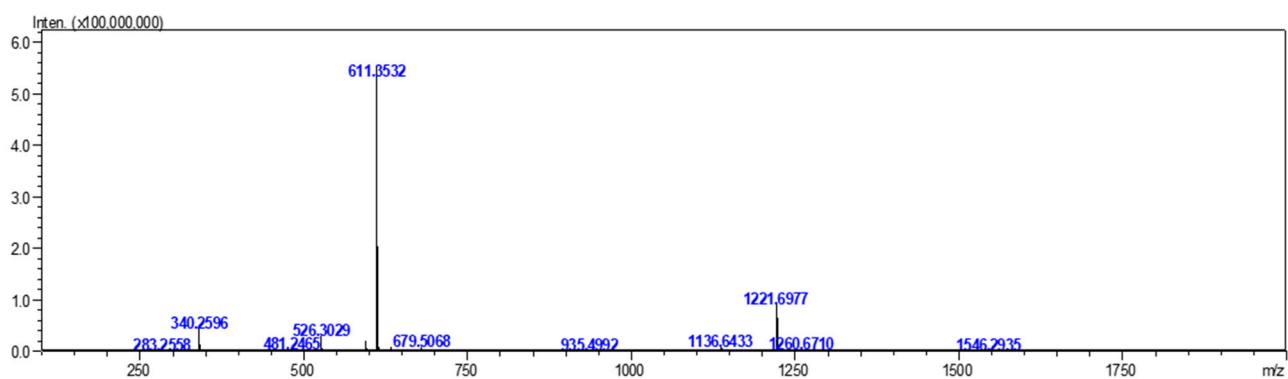

**Figure S37.** ESI-MS of Aib- enkephalin ion  $[M+H]^+$  (611.3532 Da)

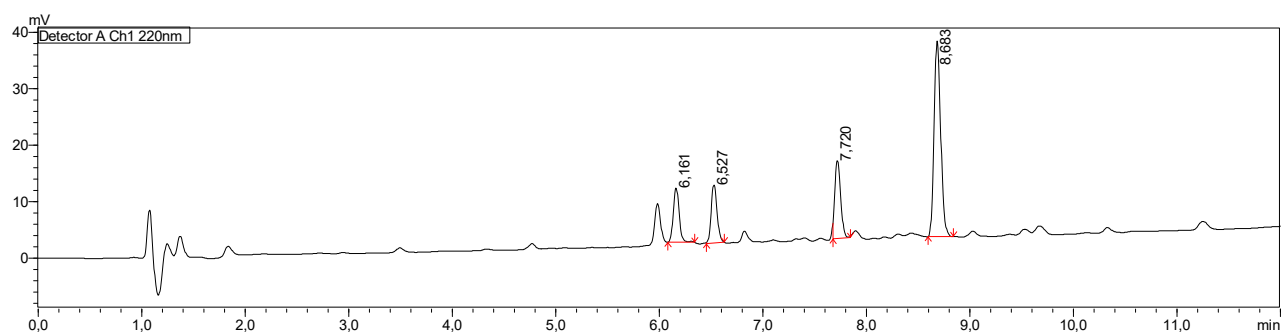

| Peak# | Name        | Ret. Time | Width | Area   | Height | Area%  |
|-------|-------------|-----------|-------|--------|--------|--------|
| 1     | Des-Aib-Gln | 6,161     | 0,110 | 37987  | 9633   | 13,231 |
| 2     | Des-Asp     | 6,527     | 0,110 | 40576  | 10226  | 14,132 |
| 3     | Des-Val     | 7,720     | 0,114 | 54264  | 13765  | 18,900 |
| 4     | Aib-ACP     | 8,683     | 0,124 | 154288 | 34533  | 53,737 |

**Figure S38.** Chromatogram of Aib-ACP synthesized in DMF

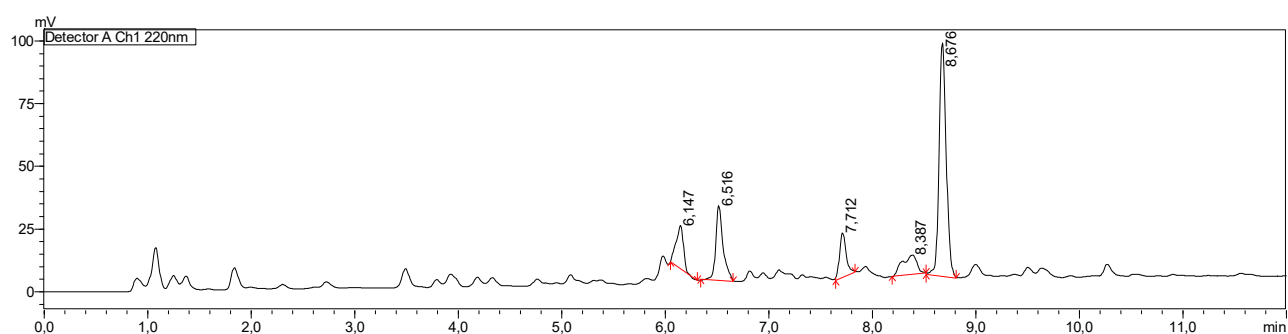

| Peak# | Name        | Ret. Time | Width | Area   | Height | Area%  |
|-------|-------------|-----------|-------|--------|--------|--------|
| 1     | Des-Aib-Gln | 6,147     | 0,140 | 81445  | 17126  | 9,792  |
| 2     | Des-Asp     | 6,516     | 0,127 | 147263 | 29768  | 17,706 |
| 3     | Des-Val     | 7,712     | 0,120 | 79572  | 17741  | 9,567  |
| 4     | Des-Aib     | 8,387     | 0,255 | 76855  | 7767   | 9,240  |
| 5     | Aib-ACP     | 8,676     | 0,131 | 446593 | 93089  | 53,695 |

**Figure S39.** Chromatogram of Aib-ACP synthesized in DMM

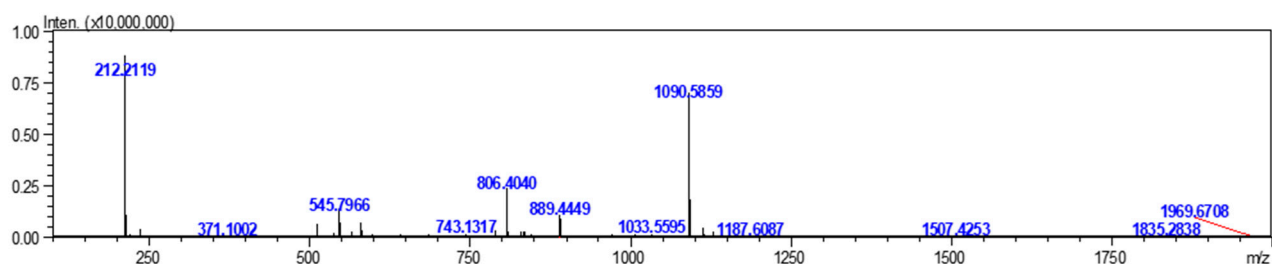

**Figure S40.** ESI-MS of Aib-ACP ion  $[M+H]^+$  (1090.5859 Da)

## Recycling of decapeptide SPPS waste stream

The scale of the decapeptide was 0.015 mmol. The amount of crude product obtained from the synthesis is 0.0996g (for all cases)

$PMI = \text{mass of materials (g)} / \text{mass of isolated product (g)}$

Specifically, mass of materials includes:

- Starting materials: Fmoc-AA-OH, DIC, Oxyma Pure®, resin, cleavage cocktail
- Solvents (DMF or DMM and Et<sub>2</sub>O for crude peptide precipitation)
- Base (piperidine)

**Table S4.** Overview of starting materials used for decapeptide (Aib-ACP) and their total mass.

|                  | MW<br>(g/mol) | d<br>(g/mL) | eq | Volume<br>(mL) | Concentration<br>(mol/L) | Mass<br>(g) |
|------------------|---------------|-------------|----|----------------|--------------------------|-------------|
| Fmoc-Aib-OH      | 325.4         |             | 3  |                | 0.1                      | 0.187       |
| Fmoc-Gly-OH      | 297.3         |             | 3  |                | 0.1                      | 0.087       |
| Fmoc-Asn(Trt)-OH | 596.7         |             | 3  |                | 0.1                      | 0.174       |
| Fmoc-Tyr(tBu)-OH | 459.6         |             | 3  |                | 0.1                      | 0.134       |
| Fmoc-Asp(tBu)-OH | 411.5         |             | 3  |                | 0.1                      | 0.120       |
| Fmoc-Ile-OH      | 353.4         |             | 3  |                | 0.1                      | 0.203       |
| Fmoc-Val-OH      | 339.4         |             | 3  |                | 0.1                      | 0.099       |
| Fmoc-Gln(Trt)-OH | 610.7         |             | 3  |                | 0.1                      | 0.178       |
| OxymaPure        | 142.1         |             | 3  |                | 0.5                      | 0.408       |
| DIC              | 126.2         | 0.815       | 6  |                | 0.5                      | 0.080       |
| Piperidine       | 85.1          | 0.862       |    | 14.548         | 2.0                      | 12.540      |

## Cleavage and precipitation

|                   |        |       |  |       |               |              |
|-------------------|--------|-------|--|-------|---------------|--------------|
| TFA               | 114.2  | 1.489 |  | 4.75  |               | 7.070        |
| TIPS              | 158.36 | 0.773 |  | 0.125 |               | 0.0966       |
| H <sub>2</sub> O  | 18.02  | 0.997 |  | 0.125 |               | 0.124        |
| Et <sub>2</sub> O | 102.17 | 0.725 |  | 75.0  |               | 54.370       |
|                   |        |       |  |       | <b>Total:</b> | <b>75.87</b> |

**Table S5.** Overview of solvents used for decapeptide (Aib-ACP) and their total mass.

### DMF

|                                 | MW<br>(g/mol) | d<br>(g/mL) | Volume<br>(mL) | Mass<br>(g)   |
|---------------------------------|---------------|-------------|----------------|---------------|
| DMF couplings                   | 73.09         | 0.944       | 44.28          | 41.80         |
| DMF washings after couplings    | 73.09         | 0.944       | 90.00          | 84.96         |
| DMF deprotection                | 73.09         | 0.944       | 40.45          | 38.18         |
| DMF washings after deprotection | 73.09         | 0.944       | 156.00         | 147.26        |
| <b>Total:</b>                   |               |             |                | <b>312.20</b> |

### DMM

|                                 | MW<br>(g/mol) | d<br>(g/mL) | Volume<br>(mL) | Mass<br>(g)   |
|---------------------------------|---------------|-------------|----------------|---------------|
| DMM couplings                   | 162.23        | 0.90        | 44.28          | 39.85         |
| DMM washings after couplings    | 162.23        | 0.90        | 90.00          | 81            |
| DMM deprotection                | 162.23        | 0.90        | 40.45          | 36.40         |
| DMM washings after deprotection | 162.23        | 0.90        | 156.00         | 140.4         |
| <b>Total:</b>                   |               |             |                | <b>297.65</b> |

**Table S6.** Total mass of materials used for SPPS without recycling and PMI

|                                      | Solvent       |               |
|--------------------------------------|---------------|---------------|
|                                      | DMF           | DMM           |
| Total mass of starting materials (g) | 75.87         | 75.87         |
| Total mass of solvents (g)           | 312.20        | 297.65        |
| <b>Total (g)</b>                     | <b>388.07</b> | <b>373.52</b> |

### PMI

$$PMI = \frac{\sum \text{mass of materials (g)}}{\text{mass of isolated product (g)}}$$

$$PMI \text{ of synthesis in DMF} = \frac{388.07}{0.0996} = 3896.28$$

$$PMI \text{ of synthesis in DMM} = \frac{373.52}{0.0996} = 3750.20$$

**Table S7.** Total mass of recovered solvent (DMM) and PMI with recycling of synthesis in DMM

|                                    | Solvent |
|------------------------------------|---------|
|                                    | DMM     |
| Total mass of solvent (g)          | 297.65  |
| Total mass of recycled solvent (g) | 237     |

$$PMI \text{ (with recycling)} = \frac{\sum \text{mass of materials} - \sum \text{mass of recovered materials}}{\text{mass of isolated product}}$$

$$PMI \text{ (with recycling)} = \frac{373.52 - 237}{0.0996} = 1370.68$$

**Figure S41.** (a) <sup>1</sup>H NMR spectrum (CD<sub>2</sub>Cl<sub>2</sub>, 400 MHz, 298 K) of DMM recovered from

distillation processes; (b)  $^1\text{H}$  NMR spectrum of DMM

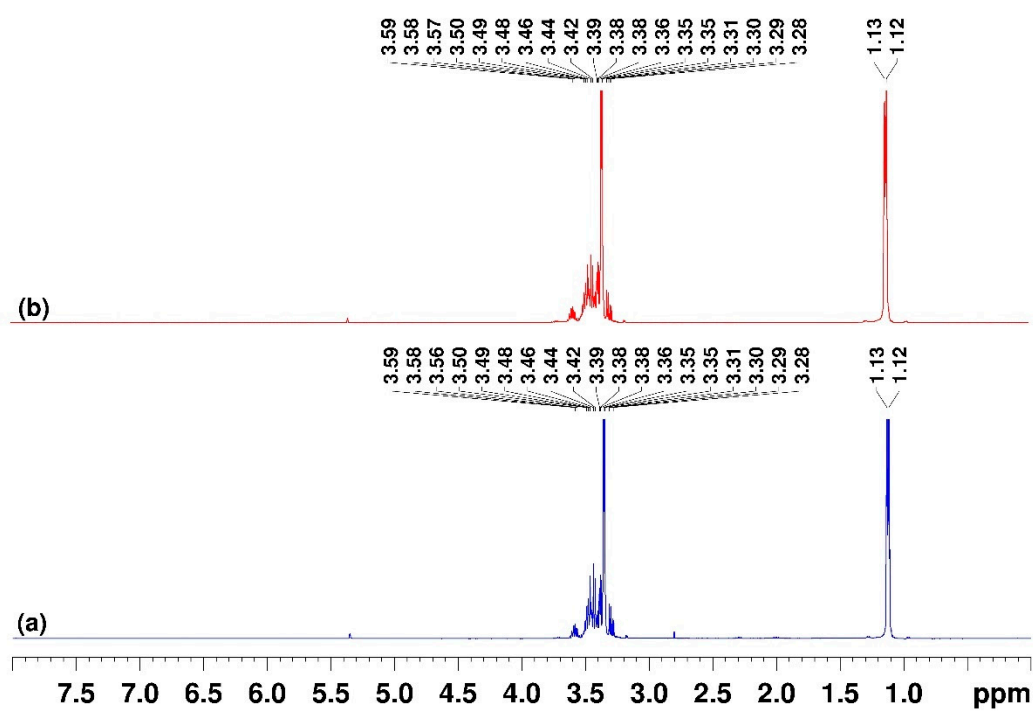

Supplement: s1 [file s1]
